# Supplementary material for: Silver nanoparticles with different size and shape: equal cytotoxicity, but different antibacterial effects
Source: Royal Society of Chemistry journal article supplement (doi:10.1039/c5ra27836h), 2016-01-01
Supplement: c5ra27836h1.pdf [file c5ra27836h1.pdf]

## Supporting Information

# Silver nanoparticles with different size and shape: Equal cytotoxicity, but different antibacterial effect

J. Helmlinger,<sup>1,†</sup> C. Sengstock,<sup>2,†</sup> C. Groß-Heitfeld,<sup>3</sup> C. Mayer,<sup>3</sup> T.A. Schildhauer,<sup>2</sup> M. Köller,<sup>2</sup> M. Eppe<sup>1,\*</sup>

<sup>1</sup> Inorganic Chemistry and Center for Nanointegration Duisburg-Essen (CeNIDE), University of Duisburg-Essen, Universitaetsstr. 5-7, 45117 Essen, Germany

<sup>2</sup> Bergmannsheil University Hospital/Surgical Research, Ruhr-University of Bochum, Buerkle-de-la-Camp-Platz 1, 44789 Bochum, Germany

<sup>3</sup> Physical Chemistry and Center for Nanointegration Duisburg-Essen (CeNIDE), University of Duisburg-Essen, Universitaetsstr. 5-7, 45117 Essen, Germany

<sup>†</sup> J. Helmlinger and C. Sengstock share first authorship.

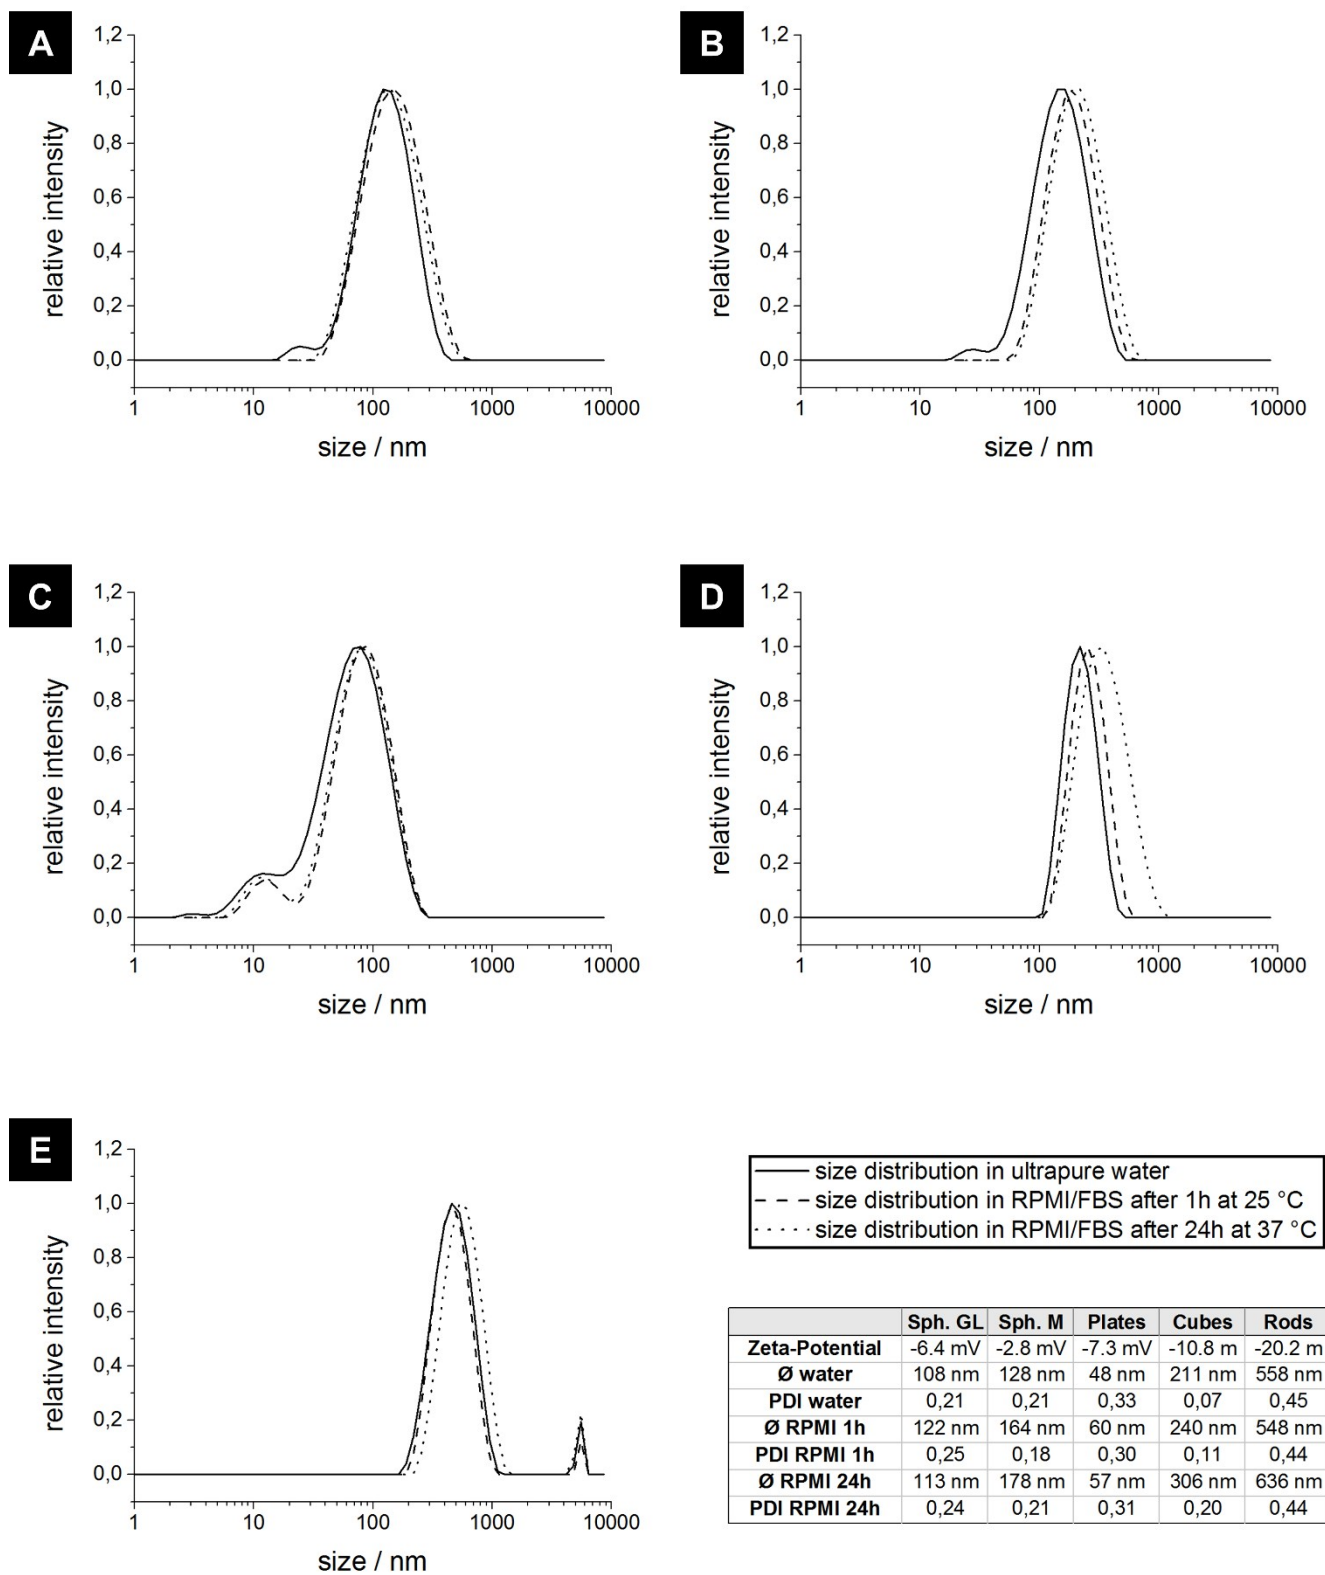

**Figure S1:** Particle size distribution obtained by dynamic light scattering of (A) silver nanospheres from glucose synthesis, (B) silver nanospheres from microwave synthesis, (C) silver nanoplates, (D) silver nanocubes and (E) silver nanorods in ultrapure water as well as in cell culture medium (RPMI/FBS) after 1 h at 25 °C and after 24 h at 37 °C.

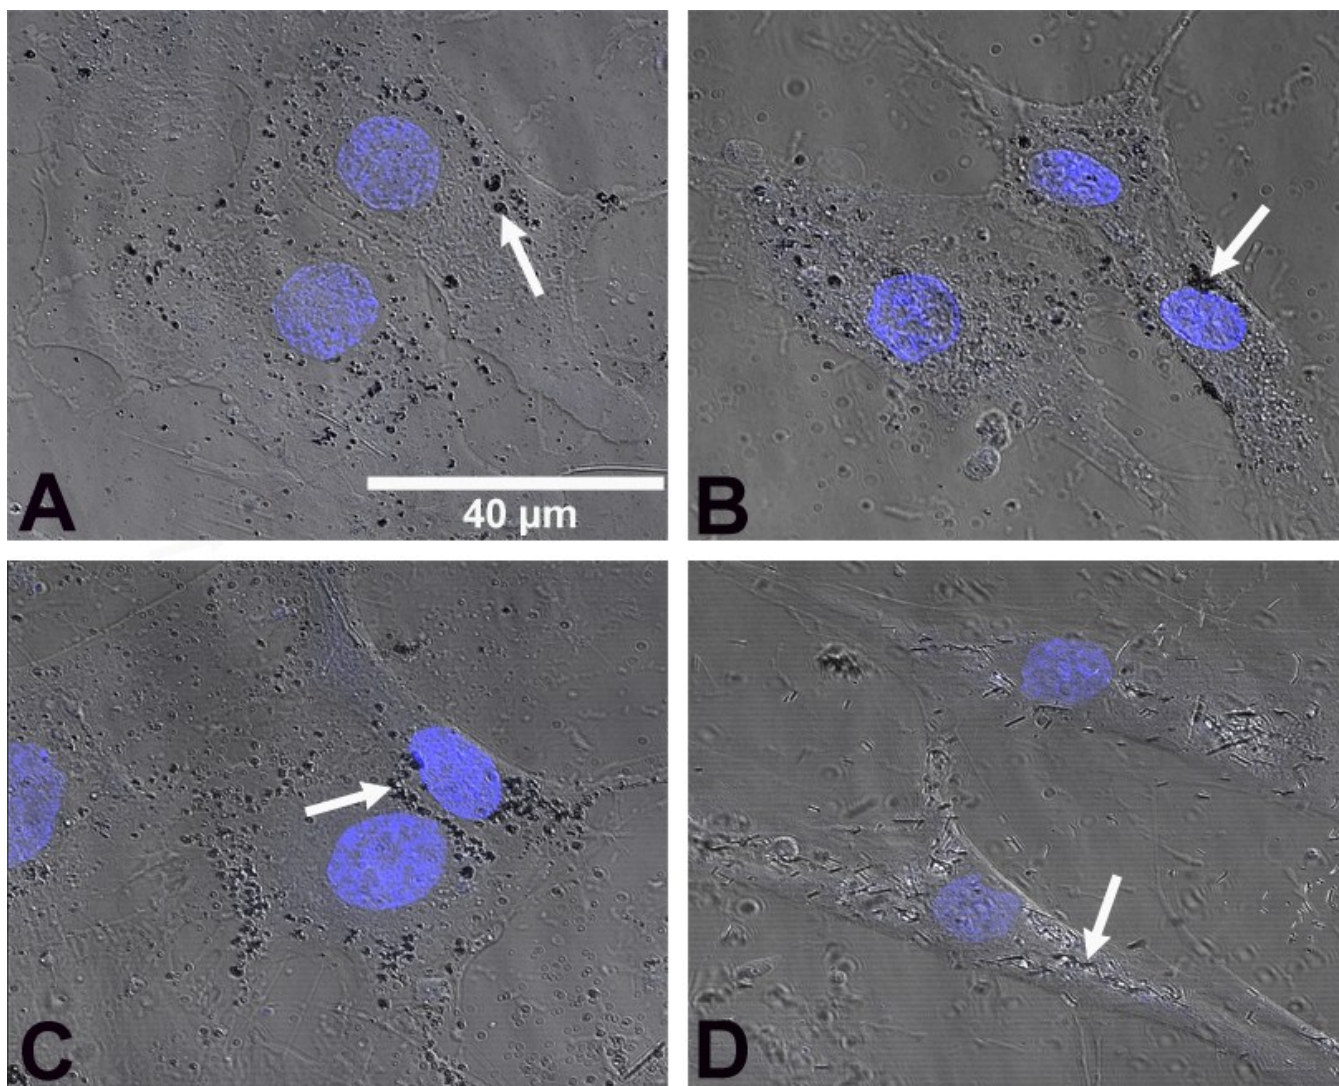

**Figure S2.** Intracellular occurrence of Ag-NP agglomerates analyzed by phase-contrast microscopy. Representative phase-contrast micrograph of hMSC treated with  $12.5 \mu\text{g mL}^{-1}$  silver nanospheres from the glucose synthesis (**A**), silver nanospheres from the microwave synthesis (**B**), silver nanocubes (**C**) and silver nanorods (**D**). The white arrows denotes the perinuclear accumulation of silver (**A-D**). The blue fluorescence of Hoechst33342 was used to stain the cell nucleus.
